# Supplementary material for: Incident type 2 diabetes attributable to suboptimal diet in 184 countries
Source: PubMed Central journal article supplement (PMC10115653; doi:10.1038/s41591-023-02278-8), 2023-04-17
Supplement: 41591_2023_2278_MOESM2_ESM.pdf [file 41591_2023_2278_MOESM2_ESM.pdf]

## Reporting Summary

Nature Portfolio wishes to improve the reproducibility of the work that we publish. This form provides structure for consistency and transparency in reporting. For further information on Nature Portfolio policies, see our [Editorial Policies](#) and the [Editorial Policy Checklist](#).

### Statistics

For all statistical analyses, confirm that the following items are present in the figure legend, table legend, main text, or Methods section.

- | n/a                                 | Confirmed                                                                                                                                                                                                                                                                                      |
|-------------------------------------|------------------------------------------------------------------------------------------------------------------------------------------------------------------------------------------------------------------------------------------------------------------------------------------------|
| <input type="checkbox"/>            | <input checked="" type="checkbox"/> The exact sample size ( $n$ ) for each experimental group/condition, given as a discrete number and unit of measurement                                                                                                                                    |
| <input checked="" type="checkbox"/> | <input type="checkbox"/> A statement on whether measurements were taken from distinct samples or whether the same sample was measured repeatedly                                                                                                                                               |
| <input type="checkbox"/>            | <input checked="" type="checkbox"/> The statistical test(s) used AND whether they are one- or two-sided<br><i>Only common tests should be described solely by name; describe more complex techniques in the Methods section.</i>                                                               |
| <input checked="" type="checkbox"/> | <input type="checkbox"/> A description of all covariates tested                                                                                                                                                                                                                                |
| <input type="checkbox"/>            | <input checked="" type="checkbox"/> A description of any assumptions or corrections, such as tests of normality and adjustment for multiple comparisons                                                                                                                                        |
| <input type="checkbox"/>            | <input checked="" type="checkbox"/> A full description of the statistical parameters including central tendency (e.g. means) or other basic estimates (e.g. regression coefficient) AND variation (e.g. standard deviation) or associated estimates of uncertainty (e.g. confidence intervals) |
| <input type="checkbox"/>            | <input checked="" type="checkbox"/> For null hypothesis testing, the test statistic (e.g. $F$ , $t$ , $r$ ) with confidence intervals, effect sizes, degrees of freedom and $P$ value noted<br><i>Give <math>P</math> values as exact values whenever suitable.</i>                            |
| <input checked="" type="checkbox"/> | <input type="checkbox"/> For Bayesian analysis, information on the choice of priors and Markov chain Monte Carlo settings                                                                                                                                                                      |
| <input checked="" type="checkbox"/> | <input type="checkbox"/> For hierarchical and complex designs, identification of the appropriate level for tests and full reporting of outcomes                                                                                                                                                |
| <input type="checkbox"/>            | <input checked="" type="checkbox"/> Estimates of effect sizes (e.g. Cohen's $d$ , Pearson's $r$ ), indicating how they were calculated                                                                                                                                                         |

*Our web collection on [statistics for biologists](#) contains articles on many of the points above.*

### Software and code

Policy information about [availability of computer code](#)

Data collection

Data analysis

The statistical code used for this analysis is not publicly available. The Global Dietary Database can make the statistical code available to researchers upon request. Eligibility criteria for such requests include: utilization for nonprofit purposes only, for appropriate scientific use based on a robust research plan, and by investigators from an academic institution. GDD will nominate co-authors to be included on any papers generated using GDD-generated statistical code. If you are interested in requesting access to the statistical code, please submit the following documents:

1. Proposed Research Plan: Please download and complete the Proposed Research plan form.
2. Data Sharing Agreement: Please download this form and complete the highlighted fields, have someone who is authorized to enter your institution into a binding legal agreement with outside institutions sign the document. Note: this agreement does not apply when Protected Health Information or Personally Identifiable Information are shared.
3. Email items 1 and 2 to [info@globaldietarydatabase.org](mailto:info@globaldietarydatabase.org). Please use the subject line "GDD Code Access Request".

Once all documents have been received, the GDD team will be in contact with you regarding subsequent steps.

For manuscripts utilizing custom algorithms or software that are central to the research but not yet described in published literature, software must be made available to editors and reviewers. We strongly encourage code deposition in a community repository (e.g. GitHub). See the Nature Portfolio [guidelines for submitting code & software](#) for further information.

## Data

Policy information about [availability of data](#)

All manuscripts must include a [data availability statement](#). This statement should provide the following information, where applicable:

- Accession codes, unique identifiers, or web links for publicly available datasets
- A description of any restrictions on data availability
- For clinical datasets or third party data, please ensure that the statement adheres to our [policy](#)

All data used in this analysis is publicly available from the following sources:

- (1) Individual dietary intake estimate distribution data [Global Dietary Database (GDD)- Download 2018 Final Estimates: <https://www.globaldietarydatabase.org/data-download>]
- (2) Stratum-specific global mean BMI, converted to overweight and underweight prevalence distribution data [NCD Risk Factor Collaboration (NCD-RisC) - Data Downloads: <https://ncdrisc.org/data-downloads.html>]
- (3) T2D burden incidence estimate distribution data [Global Health Data Exchange - Global Burden of Disease Study 2019 (GBD 2019) Results Tool: <https://vizhub.healthdata.org/gbd-results/>]
- (4) Linear, BMI-stratified effects of dietary factors on weight gain or weight loss: Mozaffarian, D, Hao, T, Rimm, EB, Willett, WC, & Hu, FB. Changes in diet and lifestyle and long-term weight gain in women and men. *N Engl J Med*. 2011; 364(25): 2392-2404. doi:10.1056/NEJMoa1014296
- (5) Direct, proportional, age-adjusted effects of BMI on T2D: Singh, GM, Danaei, G, Farzadfar, F, et al. The Age-Specific Quantitative Effects of Metabolic Risk Factors on Cardiovascular Diseases and Diabetes: A Pooled Analysis. *PLoS ONE*. 2013; 8(7): e65174. doi:10.1371/journal.pone.0065174
- (6) Direct, proportional, aged-adjusted effects of diet on T2D:
  - a) whole grains: Reynolds, A, Mann, J, Cummings, J, Winter, N, Mete, E, & Te Morenga, L. Carbohydrate quality and human health: a series of systematic reviews and meta-analyses. *Lancet (London, England)*. 2019; 393(10170): 434-445. doi:10.1016/s0140-6736(18)31809-9
  - b) all remaining dietary factors: Miller, V, Micha, R, Choi, E, Karageorgou, D, Webb, P, & Mozaffarian, D. Evaluation of the Quality of Evidence of the Association of Foods and Nutrients With Cardiovascular Disease and Diabetes: A Systematic Review. *JAMA Network Open*. 2022; 5(2): e2146705-e2146705. doi:10.1001/jamanetworkopen.2021.46705  
doi:10.1371/journal.pone.0065174
- (7) Optimal intake levels for dietary factors: Micha, R, Shulkin, ML, Penalvo, JL, et al. Etiologic effects and optimal intakes of foods and nutrients for risk of cardiovascular diseases and diabetes: Systematic reviews and meta-analyses from the Nutrition and Chronic Diseases Expert Group (NutriCoDE). *PLoS ONE*. 2017; 12(4): e0175149. doi:10.1371/journal.pone.0175149
- (8) Population demographic data: UN population Division (age, sex, urbanicity); Barro, R, & Lee, J. A New Data Set of Educational Attainment in the World, 1950-2010. *Journal of Developmental Economics*. 2013; 104: 184-198
- (9) Socio-demographic Index (SDI) data Global Health Data Exchange: Global Burden of Disease Study 2019 (GBD 2019) Socio-Demographic Index (SDI) 1950-2019 - <https://ghdx.healthdata.org/record/ihme-data/gbd-2019-socio-demographic-index-sdi-1950-2019>.
- (10) FAO Food Balance Sheet data for the energy availability of "wheat and products" and "rice and products"(kcal/capita/day): United Nations Food and Agriculture Organization: Food Availability Data - <http://www.fao.org/faostat/en/#home>
- (11) Global glycemic load estimates for wheat and rice products: Atkinson, FS, Foster-Powell, K, & Brand-Miller, JC. International tables of glycemic index and glycemic load values: 2008. *Diabetes Care*. 2008; 31(12): 2281-2283. doi:10.2337/dc08-1239
- (12) Caloric content per 100 g for wheat and rice products: U.S. Department of Agriculture Agricultural Research Service Food and Nutrient Database for Dietary Studies 2017-2018: [www.ars.usda.gov/nea/bnrc/fsrg](http://www.ars.usda.gov/nea/bnrc/fsrg)

## Human research participants

Policy information about [studies involving human research participants and Sex and Gender in Research](#).

|                             |                                                                                                                                                                                     |
|-----------------------------|-------------------------------------------------------------------------------------------------------------------------------------------------------------------------------------|
| Reporting on sex and gender | <input type="text" value="This study involved secondary data analysis from publicly available databases. No human research participants were involved in this original analysis."/> |
| Population characteristics  | <input type="text" value="NA"/>                                                                                                                                                     |
| Recruitment                 | <input type="text" value="NA"/>                                                                                                                                                     |
| Ethics oversight            | <input type="text" value="NA"/>                                                                                                                                                     |

Note that full information on the approval of the study protocol must also be provided in the manuscript.

## Field-specific reporting

Please select the one below that is the best fit for your research. If you are not sure, read the appropriate sections before making your selection.

- Life sciences       Behavioural & social sciences       Ecological, evolutionary & environmental sciences

For a reference copy of the document with all sections, see [nature.com/documents/nr-reporting-summary-flat.pdf](https://nature.com/documents/nr-reporting-summary-flat.pdf)

## Behavioural & social sciences study design

All studies must disclose on these points even when the disclosure is negative.

|                   |                                                                                                                                                                                                                                                                                                                                                                                                                                                                                                                                                                                                                 |
|-------------------|-----------------------------------------------------------------------------------------------------------------------------------------------------------------------------------------------------------------------------------------------------------------------------------------------------------------------------------------------------------------------------------------------------------------------------------------------------------------------------------------------------------------------------------------------------------------------------------------------------------------|
| Study description | Quantitative, comparative risk assessment (CRA) modeling analysis incorporating independently derived inputs and parameters on demographics, dietary risk factors, their etiologic effects, and type II diabetes incidence to model attributable burdens at the global, regional, and national levels, and by key sociodemographic factors.                                                                                                                                                                                                                                                                     |
| Research sample   | Global adult population (20+ years): 35,328 population strata across 184 countries in each year (1990 and 2018)                                                                                                                                                                                                                                                                                                                                                                                                                                                                                                 |
| Sampling strategy | We incorporated dietary data from the Global Dietary Database (GDD), population demographics from the United Nations, adiposity and diabetes distributions from the NCD Risk Factor Collaboration and Global Burden of Disease (GBD) study, direct and BMI-mediated etiologic effects of dietary factors on T2D from pooled multivariable-adjusted analyses, and optimal dietary intakes from published sources into a comparative risk assessment modeling framework to estimate the impact of 11 dietary factors, separately and jointly, on the absolute and proportional burdens of new T2D cases globally. |
| Data collection   | The data sources are all published and publicly available. In brief, estimates of dietary intake, T2D incidence, and overweight/obesity prevalence were sourced from Bayesian hierarchical prediction models, incorporating nationally representative, stratified survey data on the respective outcome (i.e., dietary intake, T2D incidence, etc.). Etiologic effects were extracted from meta-analyses of randomized control trials and prospective cohort studies as well as pooled prospective cohort studies.                                                                                              |
| Timing            | 1990 and 2018                                                                                                                                                                                                                                                                                                                                                                                                                                                                                                                                                                                                   |
| Data exclusions   | 3 countries excluded from GDD prediction models due to lack of FAO food availability covariate data; and 1 additional country was excluded due to lack of T2D incidence data in the Global Burden of Disease study.                                                                                                                                                                                                                                                                                                                                                                                             |
| Non-participation | NA, only applicable for RCTs and cohort studies                                                                                                                                                                                                                                                                                                                                                                                                                                                                                                                                                                 |
| Randomization     | NA, only applicable for RCTs                                                                                                                                                                                                                                                                                                                                                                                                                                                                                                                                                                                    |

## Reporting for specific materials, systems and methods

We require information from authors about some types of materials, experimental systems and methods used in many studies. Here, indicate whether each material, system or method listed is relevant to your study. If you are not sure if a list item applies to your research, read the appropriate section before selecting a response.

### Materials & experimental systems

### Methods

| n/a                                 | Involved in the study                                  |
|-------------------------------------|--------------------------------------------------------|
| <input checked="" type="checkbox"/> | <input type="checkbox"/> Antibodies                    |
| <input checked="" type="checkbox"/> | <input type="checkbox"/> Eukaryotic cell lines         |
| <input checked="" type="checkbox"/> | <input type="checkbox"/> Palaeontology and archaeology |
| <input checked="" type="checkbox"/> | <input type="checkbox"/> Animals and other organisms   |
| <input checked="" type="checkbox"/> | <input type="checkbox"/> Clinical data                 |
| <input checked="" type="checkbox"/> | <input type="checkbox"/> Dual use research of concern  |

| n/a                                 | Involved in the study                           |
|-------------------------------------|-------------------------------------------------|
| <input checked="" type="checkbox"/> | <input type="checkbox"/> ChIP-seq               |
| <input checked="" type="checkbox"/> | <input type="checkbox"/> Flow cytometry         |
| <input checked="" type="checkbox"/> | <input type="checkbox"/> MRI-based neuroimaging |
